# Supplementary material for: Mapping model units to visual neurons reveals population code for social behaviour
Source: PubMed Central journal article supplement (PMC11136655; doi:10.1038/s41586-024-07451-8), 2024-05-22
Supplement: 41586_2024_7451_MOESM1_ESM.pdf [file 41586_2024_7451_MOESM1_ESM.pdf]

---

**Supplementary information**

---

**Mapping model units to visual neurons  
reveals population code for social behaviour**

---

In the format provided by the  
authors and unedited

| cell type | driver line                   | AD in <i>attP40</i><br>(or VK00027) | DBD in <i>attP2</i> |
|-----------|-------------------------------|-------------------------------------|---------------------|
| control   | Empty_Split-Gal4<br>(BL79603) | -                                   | -                   |
| LC4       | SS00315                       | R47H03                              | R72E01              |
| LC6       | OL0077B                       | R92B02                              | R41C07              |
| LC9       | SS02651                       | VT032961                            | VT040569            |
| LC10a     | OL0019B                       | R35D04                              | R22D06              |
| LC10ad    | OL0020B                       | R35D04                              | R80E07              |
| LC10bc    | OL0023B                       | R72C08                              | R50D07              |
| LC10d     | SS03822                       | VT043920                            | R91B01              |
| LC11      | OL0015B                       | R22H02                              | R20G06              |
| LC12      | OL0008B                       | R35D04                              | R55F01              |
| LC13      | OL0027B                       | R14A11                              | R50C10              |
| LC15      | OL0042B                       | R26A03                              | R24A02              |
| LC16      | OL0046B                       | R26A03                              | R54A05              |
| LC17      | OL0005B                       | R21D03                              | R65C12              |
| LC18      | OL0010B                       | R92B11                              | R82D11              |
| LC20      | SS00343                       | R17A04                              | R35B06              |
|           |                               | (VK00027)                           |                     |
| LC21      | OL0044B                       | R55C04                              | R85F11              |
| LC22      | OL0001B                       | R64G10                              | R35B06              |
| LC24      | SS02638                       | VT038216                            | VT026477            |
| LC25      | SS02650                       | VT009792                            | VT002021            |
| LC26      | SS02445                       | VT007747                            | R85H06              |
| LC31      | SS04926                       | VT038873                            | VT025493            |
| LC31      | SS05022                       | VT045617                            | VT025493            |
| LPLC1     | OL0029B                       | R64G09                              | R37H04              |
| LPLC2     | OL0048B                       | R19G02                              | R75G12              |

**Supplemental Table 1.** Genetic line information for each of the LC types. ALL LC lines (Wu et al. eLife) and the spGAL4 control line were generously provided by M. Reiser, A. Nern, and G. Rubin. The LC31 lines were generously provided by A. Nern and G. Rubin ahead of publication (Nern et al., *in prep.*). The empty stable split GAL4 line (spGAL4) was used as a control line (BL79603): *w*[1118]; *Py*[+*t*7.7] *w*[+*m*C]=*p*65.*AD.UwattP40*; *Py*[+*t*7.7] *w*[+*m*C]=*GAL4.DBD.UwattP2* [? ]. Males were paired with females of the following genotype: PIBL (pheromone-insensitive and blind) *w*+/*w*+; *GMR-hid*/+; *orco*/*orco* (recombined into the CS background, see below)

In Extended Data Figure ??, the CS control data was from a previous study [? ], listed as Wildtype 2, Canton S laboratory strain. Blind males (BL) were of the following genotype and also recombined into the Canton S background: *w*+/*w*+; *GMR-hid*/*GMR-hid*, also from the same previous study [? ].

More information can be found at the following websites:

- <https://splitgal4.janelia.org/precomputed/LC%20Paper.html>
- <https://flybase.org/reports/FBst0028996.html>
- <https://flybase.org/reports/FBtp0001264.html>

| cell type | driver line | AD in <i>attP40</i> | DBD in <i>attP2</i> |
|-----------|-------------|---------------------|---------------------|
| LC6       | OL0070B     | R91B01              | R22A07              |
| LC11      | OL0015B     | R22H02              | R20G06              |
| LC12      | OL0008B     | R35D04              | R55F01              |
| LC15      | OL0042B     | R26A03              | R24A02              |
| LC17      | OL0005B     | R21D03              | R65C12              |

**Supplemental Table 2.** We crossed each of the 5 LC split lines to GCaMP6f (+/+; UAS GCaMP6f/CyO; +, provided by the Clandinin Lab) and imaged from the male progeny.
